# Supplementary material for: Molecular palladium catalyst enabling efficient electrochemical C–C bond cleavage within lignin model compounds
Source: Royal Society of Chemistry journal article supplement (doi:10.1039/d3cy01676e), 2024-01-01
Supplement: d3cy01676e1.pdf [file d3cy01676e1.pdf]

## Supporting Information:

# Molecular palladium catalyst enabling efficient electrochemical C-C bond cleavage within lignin model compound

*Peidong Ren,<sup>a</sup> Lei Shi,<sup>a</sup> Ziwang Kan,<sup>a</sup> Jiaxiao Bai,<sup>a</sup> Yunyi Liu,<sup>a</sup> Shucheng Yang,<sup>a</sup> Siqi Li<sup>\*,a</sup> and Song Liu<sup>\*,a</sup>*

*<sup>a</sup> College of Chemistry, Chemical Engineering and Resource Utilization, Northeast Forestry University, Harbin 150040, China*

*To whom correspondence should be addressed. Email: [lisiqi@nefu.edu.cn](mailto:lisiqi@nefu.edu.cn) (S. Li) and [carlosliusong@nefu.edu.cn](mailto:carlosliusong@nefu.edu.cn) (S. Liu).*

## **Table of Contents**

**Fig. S1.** SEM image of acid-washed CNTs before loading TCP-Pd.

**Fig. S2.** Raman spectra of TCP-Pd/CNTs and CNTs and the  $I_d/I_g$  of TCP-Pd/CNTs.

**Fig. S3.** The concentration standard curves of Pd element.

**Fig. S4.** Image of electrochemical test instrument.

**Fig. S5.** The GC-FID spectra of the 2-phenoxy-1-phenylethanol and its electrochemical oxidation products.

**Fig. S6.** The concentration standard curves of 2-phenoxy-1-phenylethanol and its electrochemical oxidation products.

**Fig. S7.** The instrument to detect the reaction gas phase product and the detection of the CO<sub>2</sub>.

**Table S1.** Comparison of performances of TCP-Pd/CNTs with some typical thermocatalytic and photocatalytic systems for the oxidative cleavage of 2-phenoxy-1-phenylethanol.

**References**

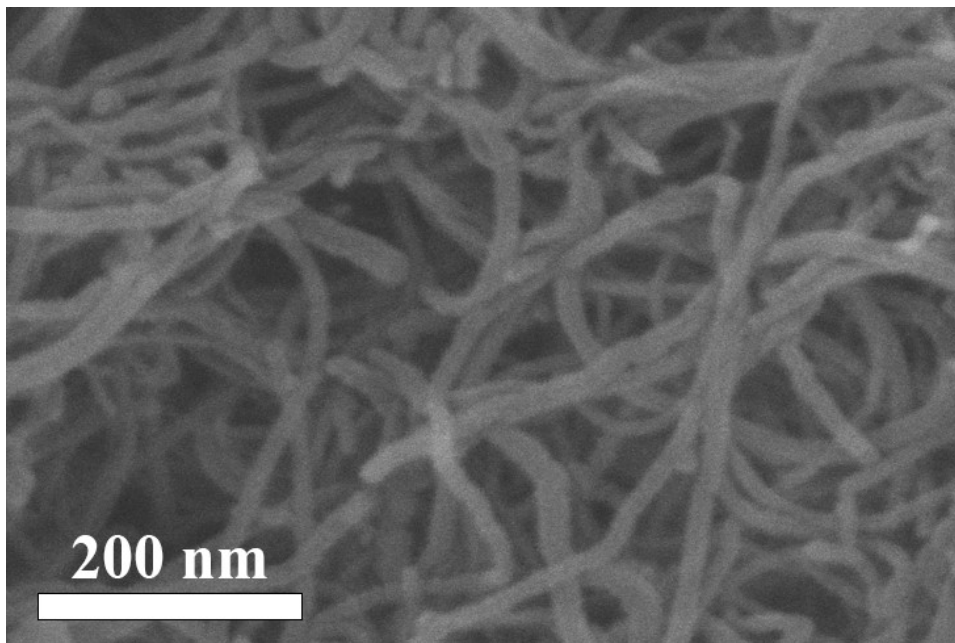

Fig. S1. SEM image of acid-washed CNTs before loading TCP-Pd.

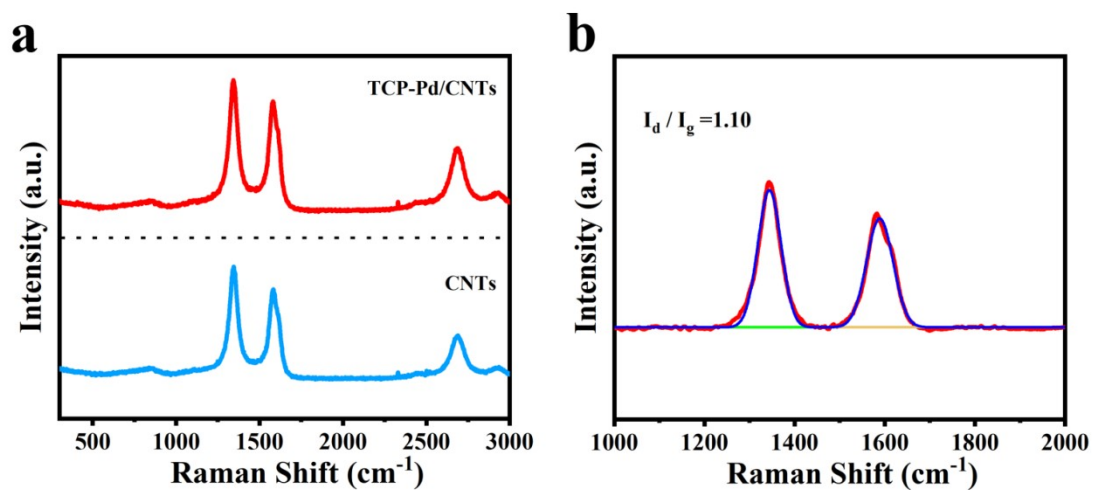

Fig. S2. (a) Raman spectra of TCP-Pd/CNTs and CNTs. (b) The  $I_d/I_g$  of TCP-Pd/CNTs.

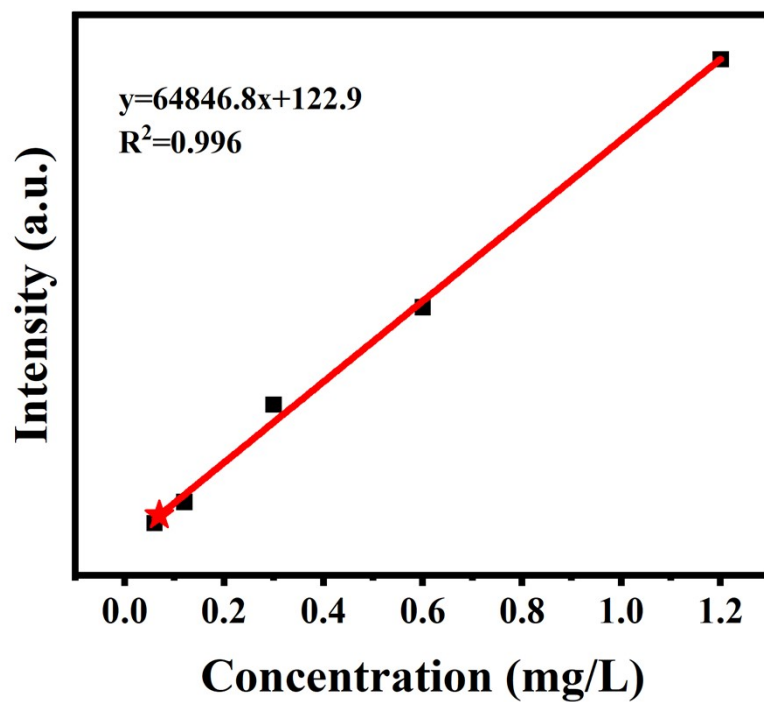

**Fig. S3.** The concentration standard curves of Pd element.

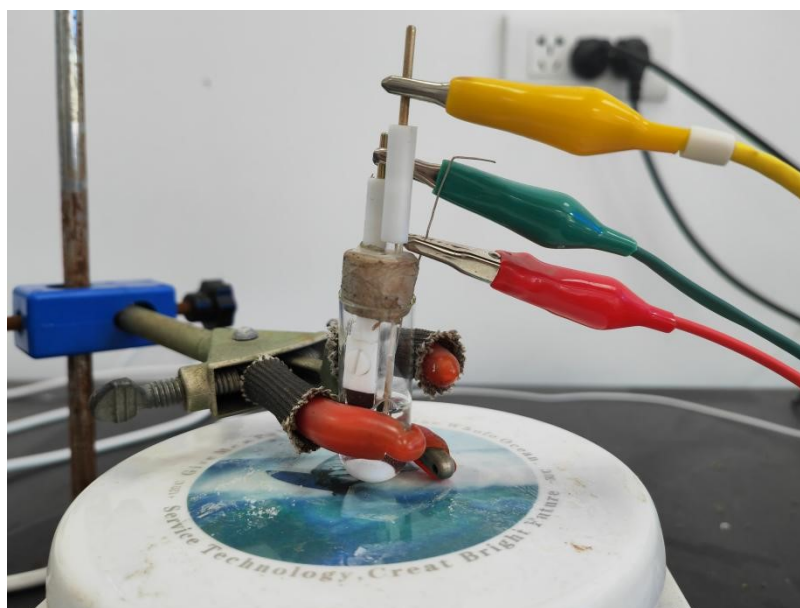

**Fig. S4.** Image of electrochemical test instrument.

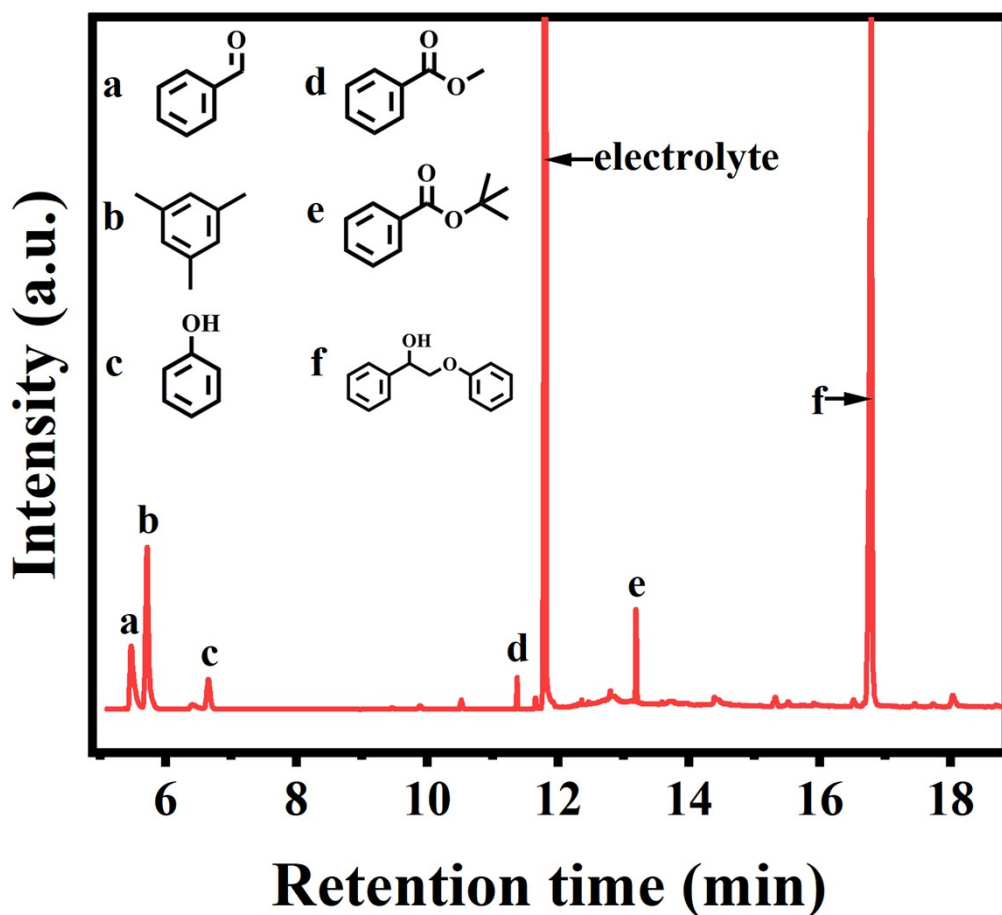

**Fig. S5.** The GC-FID spectra of the 2-phenoxy-1-phenylethanol and its electrochemical oxidation products. Mesitylene was used as internal standard.

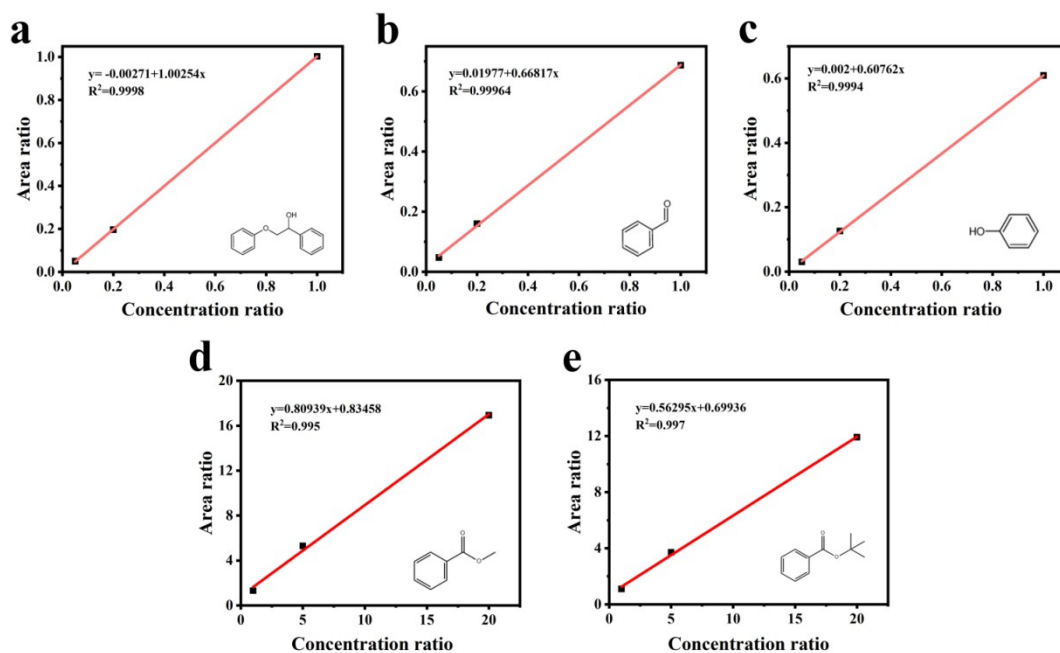

**Fig. S6.** The concentration standard curves of 2-phenoxy-1-phenylethanol and its electrochemical oxidation products.

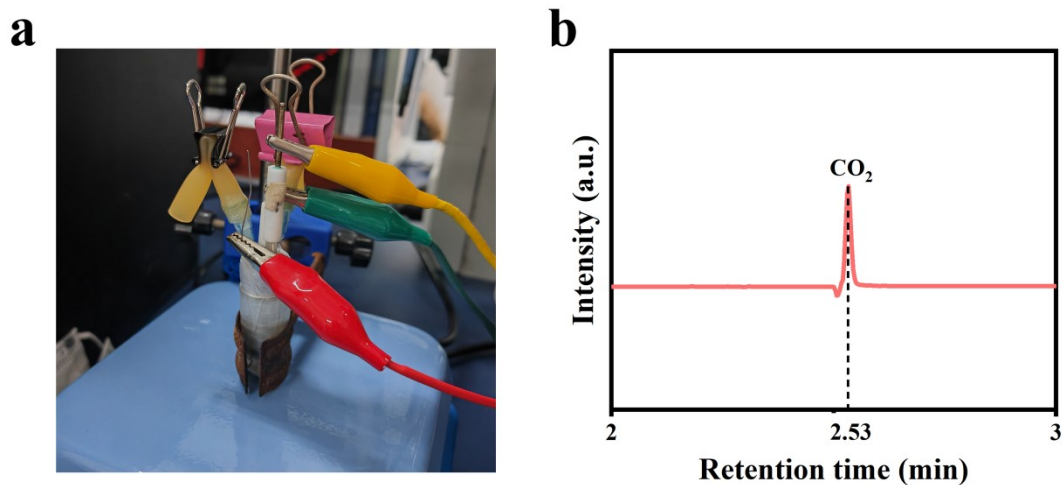

**Fig. S7.** (a) The instrument to detect the reaction gas phase product. (b) Detection of the CO<sub>2</sub>.

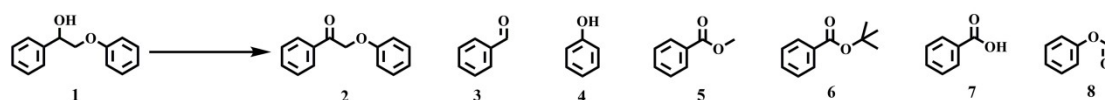

| Catalyst                                 | Reaction conditions                    | Con. 1 (%) | Product yield (%) |     |      |    |   |      |     | Ref.      |
|------------------------------------------|----------------------------------------|------------|-------------------|-----|------|----|---|------|-----|-----------|
|                                          |                                        |            | 2                 | 3   | 4    | 5  | 6 | 7    | 8   |           |
| TCP-Pd/CNTs                              | RT, air, 15mA, TBHP, 5h                | 99         |                   | 32  | 18   | 15 | 5 |      |     | This work |
| LCN <sup>a</sup>                         | 120°C, TBHP, 24h                       | 91.8       | 10.7              | 0.2 | 18.3 |    |   | 45.3 | 0.2 | 1         |
| Pd/CeO <sub>2</sub>                      | 185°C, 0.1MPa O <sub>2</sub> , 24h     | 64         | 12                |     | 48   |    |   | 0.03 |     | 2         |
| Au <sub>1</sub> -Pd <sub>1.5</sub> -CTFs | 160°C, 0.5MPa O <sub>2</sub> , 4h      | 96         | 2                 |     | 49   | 17 |   | 15   |     | 3         |
| mpg-C <sub>3</sub> N <sub>4</sub>        | 455nm LED, 0.1MPa O <sub>2</sub> , 10h | 96         | 7                 | 51  |      |    |   | 21   | 30  | 4         |
| BiVO <sub>4</sub>                        | AM 1.5 sunlight, 2.0V vs.Ag/AgCl, 20h  | 30         | 10                | 12  | 5    |    |   |      |     | 5         |

**Table S1.** Comparison of performances of TCP-Pd/CNTs with some typical thermocatalytic and photocatalytic systems for the oxidative cleavage of 2-phenoxy-1-phenylethanol.

## Reference

1. S. K. Hanson, R. T. Baker, J. C. Gordon, B. L. Scott and D. L. Thorn, *Inorg. Chem.*, 2010, **49**, 5611-5618.
2. W. Deng, H. Zhang, X. Wu, R. Li, Q. Zhang and Y. Wang, *Green Chem.*, 2015, **17**, 5009-5018.
3. L. Zhao, S. Shi, G. Zhu, M. Liu, J. Gao and J. Xu, *Green Chem.*, 2019, **21**, 6707-6716.

4. H. Liu, H. Li, J. Lu, S. Zeng, M. Wang, N. Luo, S. Xu and F. Wang, *ACS Catal.*, 2018, **8**, 4761-4771.
5. T. Li, J. Y. Mo, D. M. Weekes, K. E. Dettelbach, R. P. Jansonius, G. M. Sammis and C. P. Berlinguette, *ChemSusChem*, 2020, **13**, 3622-3626.
